# Supplementary material for: Efficient conversion of spent mushroom substrate into a high value-added anticancer drug pentostatin with engineered Cordyceps militaris
Source: Royal Society of Chemistry journal article supplement (doi:10.1039/d1gc03594k), 2021-01-01
Supplement: d1gc03594k1.pdf [file d1gc03594k1.pdf]

## **Supplementary Information:**

### **Efficient conversion of spent mushroom substrate into high value-added anticancer drug pentostatin with engineered *Cordyceps militaris***

#### **Index of Supplementary Information:**

Table S1 Oligonucleotides and sequences used in this study.

Table S2. Composition of spent mushroom (*Hypsizygus marmoreus*) substrate.

Table S3. Coefficients of factors obtained from regression model analysis of the special cubic model.

Figure S1 Expression of recombinant cellulases in transformants according to Western Blot.

Figure S2. Changes of SMS composition after fermentation with transformant CmTX.

Table S1 Oligonucleotides and sequences used in this study.

| Name                                             | Sequences (5' -3')                                                                                                                                                                                                                                                                                                                                                                                                                                                                                                                                                                                                                                                                                                                                                                                                                                                                                                                                                                                                                                                                                                                                                                                                                                                                                                                                                                                                                                                                                                                                                                                                                                                                           |
|--------------------------------------------------|----------------------------------------------------------------------------------------------------------------------------------------------------------------------------------------------------------------------------------------------------------------------------------------------------------------------------------------------------------------------------------------------------------------------------------------------------------------------------------------------------------------------------------------------------------------------------------------------------------------------------------------------------------------------------------------------------------------------------------------------------------------------------------------------------------------------------------------------------------------------------------------------------------------------------------------------------------------------------------------------------------------------------------------------------------------------------------------------------------------------------------------------------------------------------------------------------------------------------------------------------------------------------------------------------------------------------------------------------------------------------------------------------------------------------------------------------------------------------------------------------------------------------------------------------------------------------------------------------------------------------------------------------------------------------------------------|
| <i>ctcBh1</i><br>optimized for<br><i>E. coli</i> | <p>atgatgtataaaaagtttgcggcactagctgctctctgtagcggcgcgctccgcacagcaggcgtgtagctgaccgcggagaaccaccgagcttgacctgaaaa<br/> cgctgcacctcaggcggtagctgctccacgggtaagtggcagttaccattgatgcgaactggcgtggaccacaccgtgctggttcgacgaactgctataccg<br/> gtaaccagtgggataccctctgtactgacggcaaaagctgcgcacaacctgctgtgacggctgctgattacagctctacctacggcatcaccactccgg<br/> cgatagcttgaatctcaagttcgttaccagcaccagctacggcactaacgtcggctcccgtttatctgatggaaaatgacaccaagctaccagatgtttgagctgct<br/> gggtaacgagttacccttggatgctgacgtgagcaacctgggctcgggttgatggcgtctgtatttcgtgagcatggatggcggatggcggcatgagcaagtact<br/> cgggtaataaggctggcgaatacggcactgggtattgtgacgcgaatgtccgctgatctgaaatcatcaacgggtaagcgaacgtgggcaactggacc<br/> cgtgcaccaacgatgcgaacgcgggtttggctgttacggcagttgctgcagcgaatggacgtgtgggaagccaacaacatggcaacggcgtttacccgcac<br/> ccgtgtactacgggtggcagagcagatgcgaagcggacacctgggtggcacctactctagcgtacgctacgccggcgtgtgcatccggacggctgagct<br/> taacgcgtaccgtcagggtgataaaaccttacggcaagggtatgaccgtgacaccaacaagaaatgaccgtgttaccctcctataaaaactccgcagggt<br/> ttctgagcgagatcaaacgcttctatgtgcaggatggcaaatcattgccaatgcggagagcaagatcccgggcaacccgggtaacagcattaccaagaatattg<br/> cgacccccaaaagtgtcttcagcaaacaccgacactcaatcgaagggtgggatggcacaatgagcaaggcgtgtagcaggtccgatggtttgtgatgtca<br/> gtttgggacgatcattatgcaaatgctgtggctgattccacgtaccgatccagcggcgtgctccgggtgctgagcgcggctgctcccaccacatctg<br/> gtgtcccagcggagatcgaagcccaggttccgaattcaacgtgattttcctcaatattcgttttggcgaatggcagcaccgtaccggcctggacggcagcaat<br/> ccaggtaaccgactacgacagtggttccgctgcatccaccagcagcagcggctccgactccagcaccagctccccgggtgagcagccaaccggacaaccg<br/> gggtgctgcagcaccagaagtgggtaaatgggtgggatcggctacaccggctgcaccaatgctgctggcaccacctgtacgcaactgaaccgtggt<br/> attctcagtgctgtaa</p> |
| <i>trcBh1</i><br>optimized for<br><i>E. coli</i> | <p>atgtatagaaaactagctgtaatatcagcattcctcgcaccgcgcgcacagctccgctgtacccttcagagcgagaccaccggcgtgacctggcaaaaag<br/> tgcagcagtggtggcacctgcagcagcagaccggaagtgtggttattgatgcgaactggcgttgactcacgcgcaactctccaccaattgttacgacggta<br/> atacctggctgctaccctgtcccggacaatgagacttgcgcgaagaactgctgtttggacggcgcggcatatgcgagcacctacgggtttacgacttccggcaa<br/> ctctctgagcattggctttgttaccagagcgcgagaagaactggtgctgcgtttgtatctgatgcttcggacaccacgtatcaggagttcacttctgtgggcaa<br/> cgagttctctttgatgtgatgtctcaactgccgtgtggttgaatggtgctgctattttgtgagatgagatccgatggtggcgtctcaaaaatcccgacaaacac<br/> tgcgggtgcaaaagtacggcaccggtattgacagaccagctcccgcgtatctgaaattatcaatggccaggcaaacgtggaaggtgggaaccgagctcca<br/> ataacgccaacacgggatcggcggcagcagctgctgcagcgagatggacatctgggaagcgaactccatcagcgaagcgttaacccacatccgtgcac<br/> caccgttgtaagaattgtgaaggtgatggctcgggtggcacctacagcgacaaccgttacggcggtagctgcatccggacgggtgtgactggaatccgat<br/> cgctgggtgtaaccacagcttctacgggtccgggtgacagcttaccctcgcaccacaaaaagctgaccgtggttacgcaattgaaacctcgggtgcatcaac<br/> cgctattacgtgcagaacggcgtcacctccagcaaccgaatgcagaactgggttcttacagcggtaatgagctgaacgatatttgcaccgtgagggaagcgg<br/> agttcgggtgtagctctttcagcacaaggtggctgaccaatttaaaaagctaccagcggcggcatggtgtgtggtatgagcctgtgggatgactactatgta<br/> atatgtgtggtgacagtagctaccgaccaacgagaccagcttaccgcccgggtgccgtacgtggttcttcagcactagcagcgggttccggccaaagttg<br/> agagccaatccccgaatgctaaggtgacctttagcaatattaaatcggctccgattggctccacgggtaaccgtccgggtgggaaccggcagcggtaaccg<br/> caggaaactaccagagacgtccggtacgaccaccggctcctaccagggcccaccacattatggtcagtgctgggtgcatcggtcagcggcc<br/> aacggtctgcgaagcggcacaacctgccagggtgctgaa cccgtattactctcaatgtctgtaa</p>                                                                |
| <i>xynA</i><br>optimized for<br><i>E. coli</i>   | <p>atggtaaaaaaagaatattatgaatcactctagcaatggtggtccaggagcaggaggaccagctctggcgtaaagaagccaacgaccgcatcctgcaacat<br/> cgtcaacgtgaattggttattaacgtgatcgacaaagagaagaagccgtggccggtattgaaagttagatcaaaaatctcatgaatttgcgttcggtctgcaa<br/> tgaatgatcaggttctgttaacagacgtacgcagacttcttgcacaacttcaactggcagttttgagaatgagggccaagtggatgtaacgagccggaac<br/> gtggcaagatcacctacgagaagggcggacgctatgctgaactttgcgaaccgccaccagattccgggtgagagggccacgtttgtttgggaagtggagatgcca<br/> atccgaattggttaaaaagcctccgaatcacaggtgtacgagccatgaaacgccgtctggaacacgggtaaccactcaagggttaagttcgtcattggga<br/> tgttaacaacgaatgatgcagcggctgcttcaaaagatggtttgtaaaacaatctgaaatggatgtatgagagcaaaaaagattgatccacagggcactgtt<br/> gtttgtcaacgactacaatgttatcagctacggcagcaccacgcatataaaagccatattaacgagttactgacgtgggtgcccggctgagggcagctggtg<br/> caaggctatttcggcggaccgctgatccggctgttttaaggagcgtctgacgtgctggcggaaactggactgccgatttgggtaccgaatacagatagcttc<br/> atccggatgcgaaccgtcgcggcacaactgggaagccctgtatcgtgtgacattcagccatccggctgtgaagggcgttctgatgtgggtttttggcggggc<br/> gcattggcgtggcgaacacggcgtatcgtgaaccagattggcctcgaatgaggtggcgcgttatgagaagctgtcgaagaatggaccaccagcgcg<br/> tagagaagaccgatgcgaacggccaggttacgtcccggcttccatgggtacttacgaagtgcgcatcggcgaagaagcaaaatgctccaacaacagaccatt</p>                                                                                                                                                                                                                                                                                                                                                                                                                                                               |

gaattggacagcgcgaaacagacccccgctgcagctggacatcatcgtgccagtgagtaa

*ctcbh1*

optimized for  
*C. militaris*

atgatgtacaagaagttccgctctcgcagctctgttgcaggcgttcagctcaacagcttgcctctcttacagcagaaaaccaccatctctacttggaaacgtt  
gcacatcagcgggttctgtctacagttaacggcgcagtcaccaffgacgcaaattggcgttggacacacaccgttfcaggcttaccattgtacaccggtaac  
cagtgaggatacctctctttgcacagacggtaagcttgcgctcaaacctgctgcgttgacggcgccgattattctctactacggcattacaacctcagcggattctct  
caacctcaagttcgtcaccagcacaatacggtaaacggtgctctcagttacctcatggagaacgacaccaagttaccagatgttcgagctccttggcaacg  
aattacccttcgacgtcgcagtttctaaccttgggtgcgcttaacggcgtcttcttctgtctatggacgcagacggcggtatgtctaagattcaggcaacaag  
gcaggcgttaagtagctacaggttattgcgacgctcagtcgccacagatcttaagttcatcaacggcgaagctaacgtcggcaattggacacctctacaacacg  
acgctaacgcaggttttggctgtacggctctgtctcagaaatggacgttgggagggccaacaacatggctacagcttaccaccacatccttcacaacagtcg  
gtcaatctcgttgcgaagcagatacttggcggcacatattctcagatcgttacgagggcttgcgattccagacgggttgcgacttaacgcttaccgtcaaggcg  
acaagacctttacgtaaggcatgaccgtcgataccaacaagaatgaccgtcgtcaccacaattcacaagaactccgagcgtctgtctgagattaagcg  
cttctacgtccaagcaggttaagatcaccgaacgccgaatcaagatcccagtaaccaggcaactctattaccaagaatttgcgacgtcacaaggctcggc  
ttcttaacaccgacgattcaaccgtaaggcggtatgctcaaatgtctaaggctcttccggctcaatggttctgtcatgtccgttgggacgatcactacgctaa  
catgcttggctgactctacccaattgatcaagccgggtctccaggcgcagaacgagcggcttgcccaacaacatcaggcgttccagccgaaattgaggct  
caggctccaaactcaacgtcatttctccaacatctcgttggcccaattggtctcagttccaggcttgcggttctaacccaggtaaccacaacaacagctc  
ttcaccagctctactctacatctcgtccaacctctctactcctcctcagctctacaccaacaggtcaaccaggcgggttcacaacacaaaagtggggtcaatg  
cggcggtatcgggtatacgggttcacaattgcggttccgggtacaactgcaccaactcaaccttggctactctcaatgcctftaa

*trcbh1*

optimized for  
*C. militaris*

atgtaccgtaagcttgcgctcatttccgcttctcgtctcagctcgcagctcaatcagcttgcacacttcaatccgaaacacaccaccactcacttggcaaaagtgt  
cttcagcgggtacctgcacacaacaacagcgtcagctgttatcgcgcaattggcgttggacacacgctacaactcctctaccaattgtcagcagcggcaacac  
ttggtctctacccttggccagacaacgagacttgcgtaagaattgctccttgcggtgacggttgcagcttaccgttctacatacgggttcacaacatccgcaactctct  
ccattgcttctcaccagtcagctcaaaagaagctggcgtcgtcttaccttatggctctctgacaccacctaccaggaattactcctcggcaacgagttctct  
tcgacgttgacgttctcagcttctcggcttctaacggcgtctctacttcttctatggacgcagacggcggcttctaatgataccaacaacagcggcgct  
aaatacgggtacaggtattgcgattctcagtcgccacgagacctcaagttcaaacggccaagctaacgtcgaaggttgggaacctcttaacaacgccaaca  
caggcatggcggctcaggttctgtctcagagatggacatttgggaagccaactccatccgaaagcttaccaccacatccttgcacaaccttggccaagaa  
atttgcgaagcgcaggttgcggcgtacatactcagataaccgttacggcgttacttgcgatccagcgggttgcgattggaaccataccttggcaaacctc  
ttctacgggtccaggctcttcttaccctcgatacaacaagaagctcagctcgtcaccacaatcgaacctcaggcgttaataaccgtactacgtcacaacggc  
gtcacttccagcagcaaacgcagaacttggctcttattccggtaacgagctcaacgacgactattgcacagcagaagaagccgaattcggcgggttcttcttcc  
gataagggcggcctcacacaattaaagagctacatccggcgttatggttctgttatgaccttgggacgactactacgcaaacatcttggctcgttctactc  
accacaacgaacctctctacaccaggcgcagttcaggttctgtctctacatctcagcgttccagctcaggtcgaatctcaatctcaaacgccaagggtca  
cctctccaacatcaagttcggctcaattggctctacagtaaccttctgtgttaactcctccaggcgttaaccaccaggtacaacaacaacacggcgtccagcta  
caacaacaggttcttccaggccaacaacatctattacggctcagtcggcggfatcgggtattcaggtcaaccgttgcgcttcaggtacaacctgccaagtc  
tcaaccatactacagccagtgctftaa

*xynA*

optimized for  
*C. militaris*

atgatgtacaagaagttccgctctcgcagctctgttgcaggcgttcagctcaacaggtcaagaagaaggattcatgaacctcttcaacggcggctctca  
agaacaagaggatcaatcttggcgcgaaggaagtaacgacctattctccaacacgtcaacgagaactcgtcatcaacgtcatcgacaaggagaagaagccac  
ttgccggttgaagtcgagattaagcagattcgtcagaattcgttggctccgctatgaacgaccaagctcttcaaccagacatacggcacttctctgcca  
acactcaattggcggctcttcaaacgaagccaagtggttacgtaacgaaccagaacgaggcaagattactctacgagaaggccgacgctatgcttaacttgc  
caaccgtcaccagattccagttcaggtcagctctcttgggaagttgaagacccaacccaaattggctcaagctcttccaaccacgaagctacgaggctat  
gaagcgtcgttgaacacgcaggttaaccatttaaggcgaagtttgcattgggacgttaaacacgagatgatcagcggctctctcaaggatcgtctggca  
agcagatttgaagtgatgtacgaggagaccaagaagatcaccacaagctctctctctcaacgactacaacgtatctctacggcgaacaccagcctta  
taaggccacatfaacgaactccccaacttggcgtcaggtgaagctattggcttcaaggtcacttccgatcaggtgatccagttgtcgttaaggaacgact  
cgacgttggctgaacttggccttcaatttgggtaccgaafacgattccgtctaccagcgtataaccgtgaaagctctctaccgagtcgct  
tttctcaccagcagttaaagcgtctctatgtgggttggcggcgtcattggcgaggccaacacgagctattgcaaccaagattggtctctcaacgaa  
gcaggtcgtcttacgaaagctctcagagtgacacaaccaacgagttgaaagaccgacgctaacggtaagtcacttcccagcttctacgggtacatag  
aggtccgtattggcgaagaatcaagatgtccagcagcaaacattgagctcagttccgtaagcagacaccacttcaactcgcacatcgtccagtcgaata

|              |                                                            |
|--------------|------------------------------------------------------------|
| ptfcopF      | gcctgcaggtcgactctagaggatctcaaggtggccacgacaacc              |
| ptfcopR      | ctgcgagagcggcgaactctgtacatcatttgaaggtgtttgtattgaatgcgag    |
| celAF1       | tcgcagctctgttcagcggccttcagctcaacaggtcaagaagaaggagttcatgaac |
| celAR        | ttaagcgtaatctggaacatcgtatgggtattcgactgggacgatgatgtc        |
| celAF2       | gctctagaatgatgtacaagaagttcccgctctcgcagctctgttgag           |
| ptfcopR2     | gactagt ttgaaggtgtttgtattgaatgcgag                         |
| opdtrpcF     | taccatac gatgttcagattacgcttaagtagatgccaccggatc             |
| trpUF        | gaaaattccgtcaccagccctg gccgcatagttaagccagtatac             |
| Pgpdcel7aF   | gcctgcaggtcgactctagaggatcaggcaaccgggtcgaatcgga             |
| Pgpd7aR      | cggcgaactctgtacatcat tgtcttgattagaaaagtgaggtgagag          |
| Ctel7AF      | ctctacctcacttttctaatacaagaacaatgatgtacaagaagttcccg         |
| Ctel7AR      | ttaagcgtaatctggaacatcgtatgggtaaggcattgagagtaccaagggtt      |
| TrpcR        | gtatactggcttaactatgcggccagggctggtgacggaatttc               |
| pour         | cacacattattatggagaaactcgag cagggtggtgacggaatttc            |
| TrpcFn       | gctctagataccatac gatgttcagattacgct taa agtagatgccaccggatc  |
| TrpcRn       | gactagtcagggtggtgacggaatttc                                |
| Ctc7F        | gctctagaatgatgtacaagaagttcccg                              |
| Ctc7R        | gactagtaaggcattgagagtaccaagggtt                            |
| Pgpdtrcel7aR | atgacggcaagcttacggtacat tgtcttgattagaaaagtgaggtgagag       |
| Trcel7AF     | ctctacctcacttttctaatacaagaacaatgtaccgtaagcttgcgctcat       |
| Trcel7AR     | ttaagcgtaatctggaacatcgtatgggtaaggcactggctgtagtatgg         |
| Ctrc7F       | gctctagaatgtaccgtaagcttgcgctcat                            |
| Ctrc7R       | gactagtaaggcactggctgtagtatgg                               |
| Dens5F       | accgttatctcgtcggatcctctagaccgcatgtacgagtcgtgctgagc         |
| Dens5R       | ccctcgtcaagcgcctcaaggatggttacaggaggaggatggtgcaag           |
| Ura5F        | atccttgaggccttgacgaggg                                     |
| Ura5R        | cccgcattgtacagcatcattgg                                    |
| Dens3F       | ccaaatgatgctgtacaatgcgggtcgcgacccggcatttcgattcc            |
| Dens3R       | cttgcattgctcaggtcgactctagagagcagcccgccactggacc             |

---

Table S2. Composition of spent mushroom (*Hypsizygus marmoreus*) substrate.

| Nutrients              | Content in SMS (%) | Content in pretreated SMS (%) |
|------------------------|--------------------|-------------------------------|
| Aspartic acid          | 0.47 ± 0.02        | Not tested                    |
| Threonine              | 0.24 ± 0.01        | Not tested                    |
| Serine                 | 0.22 ± 0.01        | Not tested                    |
| Glutamate              | 0.68 ± 0.02        | Not tested                    |
| Glycine                | 0.27 ± 0.01        | Not tested                    |
| Alanine                | 0.28 ± 0.01        | Not tested                    |
| Valine                 | 0.27 ± 0.01        | Not tested                    |
| Methionine             | 0.29 ± 0.02        | Not tested                    |
| Isoleucine             | 0.20 ± 0.01        | Not tested                    |
| Leucine                | 0.33 ± 0.03        | Not tested                    |
| Tyrosine               | 0.10 ± 0.01        | Not tested                    |
| Phenylalanine          | 0.26 ± 0.02        | Not tested                    |
| Lysine                 | 0.22 ± 0.01        | Not tested                    |
| Histidine              | 0.15 ± 0.01        | Not tested                    |
| Arginine               | 0.17 ± 0.01        | Not tested                    |
| Proline                | 0.08 ± 0.01        | Not tested                    |
| Total amino acids      | 4.24 ± 0.17        | Not tested                    |
| Cellulose              | 26.34 ± 1.24       | 38.56 ± 3.54                  |
| Hemicellulose          | 8.93 ± 0.34        | 12.34 ± 1.34                  |
| Ligin                  | 5.03 ± 0.15        | 1.24 ± 0.02                   |
| Crude fiber            | 39.30 ± 2.14       | 52.14 ± 5.04                  |
| Soluble reducing sugar | 1.67 ± 0.03        | Not detected                  |
| Glucose                | 1.1 ± 0.02         | Not detected                  |

Table S3. Coefficients of factors obtained from regression model analysis of the special cubic model.

| Factors       | SMS <sup>a</sup> | pSMS <sup>a</sup> | SMS <sup>b</sup> | pSMS <sup>b</sup> |
|---------------|------------------|-------------------|------------------|-------------------|
| CF            | 1.06             | 1.23              | 1.30             | 2.98              |
| CBH1          | 26.75            | 32.24             | 39.95            | 41.84             |
| XynA          | 16.22            | 17.37             | 16.84            | 19.80             |
| CF*CBH1       | 41.00            | 40.63             | 29.61            | 36.28             |
| CF*XynA       | 33.13            | 36.39             | 44.50            | 45.50             |
| CBH1*XynA     | 29.92            | 27.11             | 17.11            | 27.70             |
| CF*CBH1* XynA | 383.25*          | 543.66*           | 600.67*          | 653.88*           |

<sup>a</sup> Hydrolyzed by mixture composed by recombinant CBH1 of *Trichoderma reesei*

<sup>b</sup> Hydrolyzed by mixture composed by recombinant CBH1 of *Chaetomium thermophilum*

\* The interaction between these factors was statistically significant

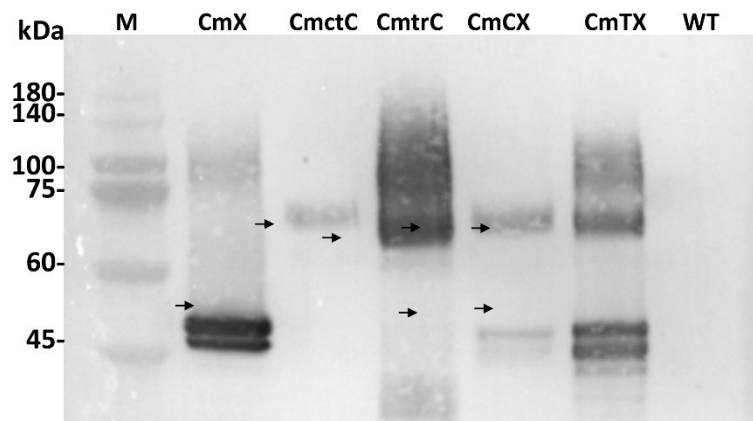

Figure S1 Expression of recombinant cellulases in transformants according to Western Blot. M: marker. Different volumes of 1  $\mu$ L (CmX, CmtrC, CmtrCX) or 30  $\mu$ L (CmctC, CmCX, WT) of cultrate filtrate were loaded on each lane. The main bands of each recombinant cellulase are indicated by a black arrow.

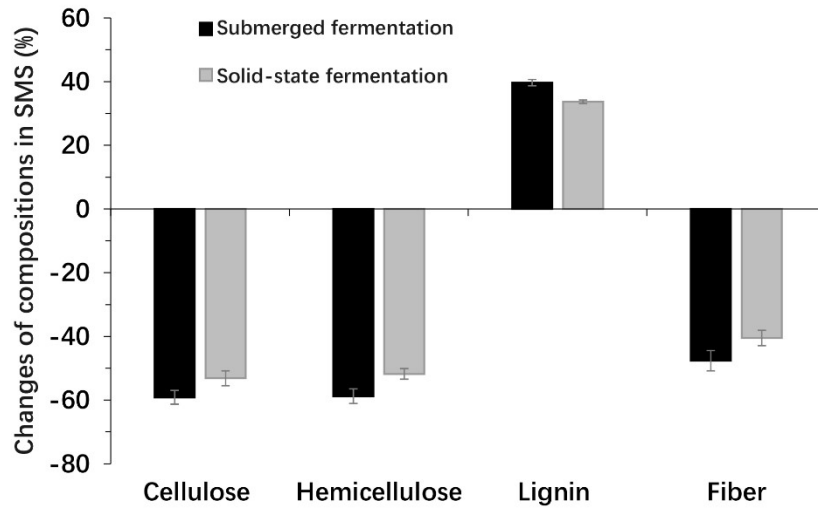

Figure S2. Changes of SMS composition after fermentation with transformant CmTX.
